# Supplementary material for: Phase separation strategy to facilely form fluorescent [Ag2]2+/[Agm]n+ quantum clusters in boro-alumino-silicate multiphase glasses
Source: Royal Society of Chemistry journal article supplement (doi:10.1039/c8cp04536d), 2018-01-01
Supplement: c8cp04536d1.pdf [file c8cp04536d1.pdf]

Supporting Information

**Phase separation strategy to facilyly form fluorescent  $[Ag_2]^{2+}/[Ag_m]^{n+}$  quantum clusters in boro-alumino-silicate multi-phase glasses**

Xiaotong Chen,<sup>a</sup> Junjie Zhao,<sup>a</sup> Xiuxia Xu,<sup>a</sup> Gaorong Han,<sup>a</sup> Kai Ren,<sup>a</sup> Xue Luo,<sup>a</sup> Xinwen Sun,<sup>a</sup>  
Xvsheng Qiao,<sup>a, †</sup> Xianping Fan<sup>a</sup> and Guodong Qian<sup>a</sup>

<sup>a</sup> *State Key Laboratory of Silicon Materials & School of Materials Science and Engineering, Zhejiang University, Hangzhou 310027, China*

\* Corresponding author. E-mail: qiaoxus@zju.edu.cn; Tel.: +86-571-87951234.

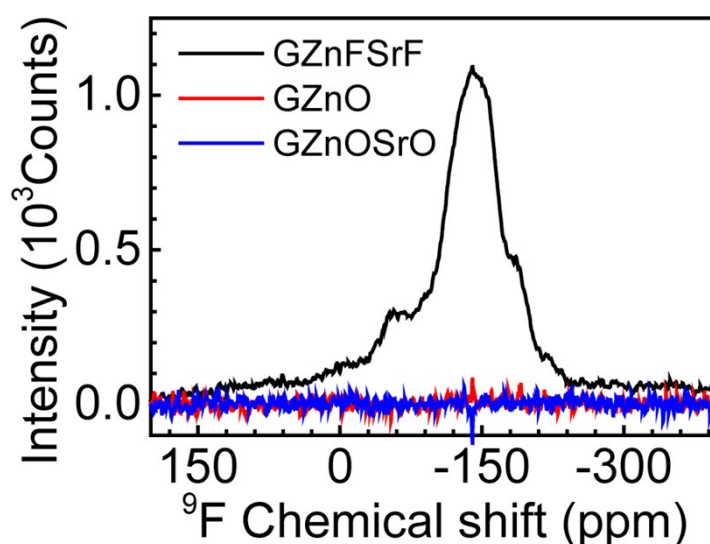

**Figure.S1**  $^9\text{F}$  NMR spectra of GZnFSrF, GZnO and GZnOSrO. It evidenced that the F in GZnO and GZnOSrO are all volatilized and there is no fluorine in the glass residue structure.

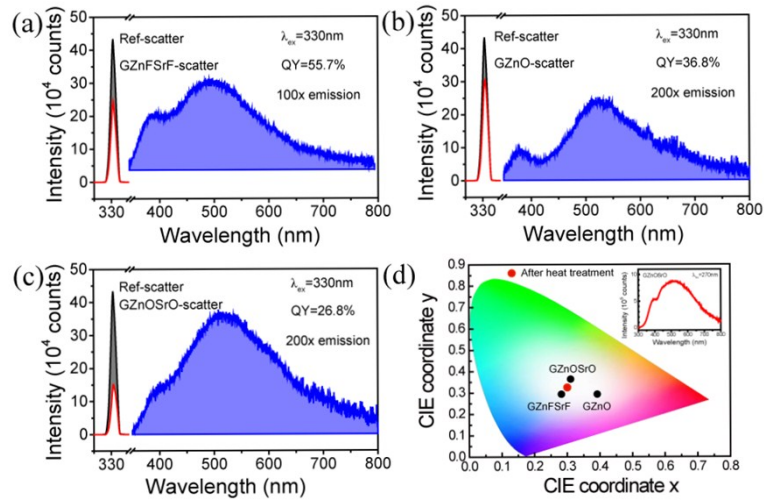

**Figure.S2** Spectra of quantum yield (QY) measurement for sample: (a) GZnFSrF annealed at 510 °C for 2h; (b) GZnO annealed at 480 °C for 2h and GZnOSrO annealed at 570 °C for 2h (c). CIE chromaticity of precursor glass of GZnFSrF, GZnO and GZnOSrO, the red point represent CIE chromaticity of GZnOSrO annealed at 570 °C for 2h, the inset is the corresponding emission spectra.

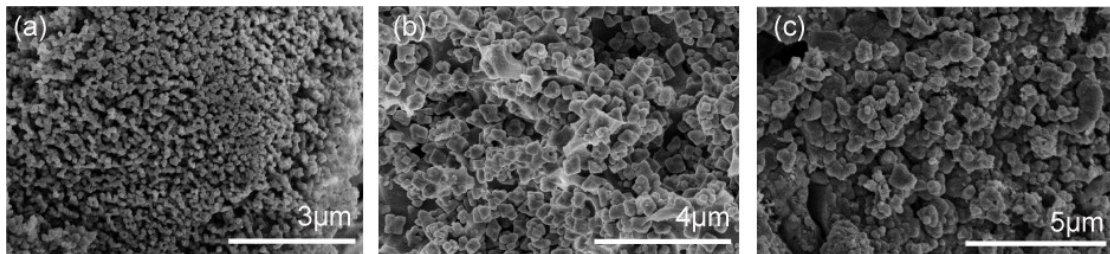

**Figure.S3** SEM observation of the interconnected borate phase separation in GZnFSrF (a), and tetragonal prismatic  $ZnAlO_4$  phase separation in GZnO (b) and irregular oxide phase separation in GZnOSrO (c).
